# Supplementary material for: Micelle formation as a factor influencing the mode(s) of metal ion partitioning into N-alkylpyridinium-based ionic liquids (ILs): implications for the design of IL-based extraction systems
Source: Royal Society of Chemistry journal article supplement (doi:10.1039/c7gc02338c), 2017-01-01
Supplement: c7gc02338c1.pdf [file c7gc02338c1.pdf]

## Supplemental Information

### Preparation and characterization of ionic liquids

The *N*-alkylpyridinium ( $C_n\text{pyr}^+$ , with  $n = 4, 6, 7, 8, 10, 12,$  and  $14$ ) and 1-alkyl-3-methylimidazolium ( $C_n\text{mim}^+$ , with  $n = 12$  and  $14$ ) ionic liquids used in this study were synthesized by a two-step process. In the first step, the bromide form of each IL was prepared by microwave irradiation of a mixture of an appropriate alkyl bromide and either pyridine (for  $C_n\text{pyr}^+$  ILs) or 1-methylimidazole ( $C_n\text{mim}^+$  ILs) according to established methods.<sup>40</sup> For the quaternary ammonium ILs ( $N_{n,111}^+$ , where  $n = 10, 12$  and  $14$ ), whose halide forms are readily available commercially, this step was unnecessary. The bromide form of each IL was then converted to the corresponding *bis*[(trifluoromethyl)sulfonylimide] ( $\text{Tf}_2\text{N}^-$ ) IL *via* an anion metathesis reaction with  $\text{LiTf}_2\text{N}$  (TCI America), again following established procedures.<sup>41</sup> The purity of the final product was confirmed by  $^1\text{H-NMR}$ , and for those compounds observed to form micelles, by elemental (CHN) analysis.

### $^1\text{H-NMR}$

*N*-alkylpyridinium ionic liquids:

$C_4\text{pyr}^+\text{Tf}_2\text{N}^-$ :

$^1\text{H NMR}$  (300 MHz,  $\text{CDCl}_3$ ):  $\delta$  8.82 (d, 2H), 8.50 (t, 1H), 8.08 (t, 2H), 4.61 (t, 2H), 2.00 (quin, 2H), 1.36-1.46 (m, 2H), 0.98 (t, 3H)

$C_6\text{pyr}^+\text{Tf}_2\text{N}^-$ :

$^1\text{H NMR}$  (300 MHz,  $\text{CDCl}_3$ ):  $\delta$  8.83 (d, 2H), 8.49 (t, 1H), 8.07 (t, 2H), 4.61 (t, 2H), 2.00 (quin, 2H), 1.30-1.39 (m, 6H), 0.88 (t, 3H)

$C_7\text{pyr}^+\text{Tf}_2\text{N}^-$ :

$^1\text{H NMR}$  (300 MHz,  $\text{CDCl}_3$ ):  $\delta$  8.83 (d, 2H), 8.50 (t, 1H), 8.08 (t, 2H), 4.62 (t, 2H), 2.02 (quin, 2H), 1.28-1.36 (m, 8H), 0.89 (t, 3H)

$C_8\text{pyr}^+\text{Tf}_2\text{N}^-$ :

$^1\text{H NMR}$  (300 MHz,  $\text{CDCl}_3$ ):  $\delta$  8.83 (d, 2H), 8.50 (t, 1H), 8.08 (t, 2H), 4.62 (t, 2H), 2.02 (quin, 2H), 1.27-1.36 (m, 10H), 0.88 (t, 3H)

$C_{10}\text{pyr}^+\text{Tf}_2\text{N}^-$ :

$^1\text{H NMR}$  (300 MHz,  $\text{CDCl}_3$ ):  $\delta$  8.83 (d, 2H), 8.50 (t, 1H), 8.09 (t, 2H), 4.63 (t, 2H), 2.03 (quin, 2H), 1.27-1.36 (m, 14H), 0.89 (t, 3H)

C<sub>12</sub>pyr<sup>+</sup>Tf<sub>2</sub>N<sup>-</sup>:

<sup>1</sup>H NMR (300 MHz, CDCl<sub>3</sub>): δ 8.82 (d, 2H), 8.50 (t, 1H), 8.08 (t, 2H), 4.63 (t, 2H), 2.03 (quin, 2H), 1.27-1.37 (m, 18H), 0.90 (t, 3H)

C<sub>14</sub>pyr<sup>+</sup>Tf<sub>2</sub>N<sup>-</sup>:

<sup>1</sup>H NMR (300 MHz, CDCl<sub>3</sub>): δ 8.81 (d, 2H), 8.50 (t, 1H), 8.09 (t, 2H), 4.65 (t, 2H), 2.04 (quin, 2H), 1.27-1.37 (m, 18H), 0.90 (t, 3H)

*N,N-dialkylimidazolium ionic liquids:*

C<sub>12</sub>mim<sup>+</sup>Tf<sub>2</sub>N<sup>-</sup>:

<sup>1</sup>H NMR (300 MHz, CDCl<sub>3</sub>): δ 8.79 (s, 1H), 7.29 (m, 2H), 4.18 (t, 2H), 3.96 (s, 3H), 1.88 (quin, 2H), 1.27-1.33 (m, 18H), 0.89 (t, 3H)

C<sub>14</sub>mim<sup>+</sup>Tf<sub>2</sub>N<sup>-</sup>:

<sup>1</sup>H NMR (300 MHz, CDCl<sub>3</sub>): δ 8.81 (s, 1H), 7.28 (m, 2H), 4.18 (t, 2H), 3.97 (s, 3H), 1.88 (quin, 2H), 1.27-1.34 (m, 22H), 0.90 (t, 3H)

*Quaternary ammonium ionic liquids:*

N<sub>10,111</sub><sup>+</sup>Tf<sub>2</sub>N<sup>-</sup>:

<sup>1</sup>H NMR (300 MHz, CDCl<sub>3</sub>): δ 3.29 (m, 2H), 3.14 (s, 9H), 1.75 (broad peak, 2H), 1.28-1.36 (m, 14H), 0.89 (t, 3H)

N<sub>12,111</sub><sup>+</sup>Tf<sub>2</sub>N<sup>-</sup>:

<sup>1</sup>H NMR (300 MHz, CDCl<sub>3</sub>): δ 3.28 (m, 2H), 3.14 (s, 9H), 1.74 (broad peak, 2H), 1.27-1.36 (m, 18H), 0.89 (t, 3H)

N<sub>14,111</sub><sup>+</sup>Tf<sub>2</sub>N<sup>-</sup>:

<sup>1</sup>H NMR (300 MHz, CDCl<sub>3</sub>): δ 3.31 (m, 2H), 3.19 (s, 9H), 1.58 (broad peak, 2H), 1.28-1.37 (m, 22H), 0.90 (t, 3H)

### **Elemental (CHN) analysis:**

C<sub>12</sub>pyr<sup>+</sup>Tf<sub>2</sub>N<sup>-</sup>:

Theoretical: %C: 43.2; %H: 5.72; %N: 5.30.

Actual: %C: 43.4; %H: 5.80; %N: 5.32.

C<sub>14</sub>pyr<sup>+</sup>Tf<sub>2</sub>N<sup>-</sup>:

Theoretical: %C: 45.3; %H: 6.16; %N: 5.03.

Actual: %C: 45.5; %H: 6.17; %N: 5.03.

## Water solubility of ionic liquids

| <b>Ionic liquid</b> | <b>Water solubility</b> |
|---------------------|-------------------------|
| C10mimTf2N          | 794 uM                  |
| C12mimTf2N          | 564 uM                  |
| C14mimTf2N          | 340 uM                  |
| N10,111Tf2N         | 693 uM                  |
| N12,111Tf2N         | 276 uM                  |
| N14,111Tf2N         | 230 uM                  |
| C10pyrTf2N          | 560 uM                  |
| C12pyrTf2N          | 132 uM                  |
| C14pyrTf2N          | 305 uM                  |
